# Supplementary material
Source: PubMed Central journal article supplement (PMC5081097)
Supplement: NIHMS70224-supplement-Supplementary_Data_3.pdf [file NIHMS70224-supplement-Supplementary_Data_3.pdf]

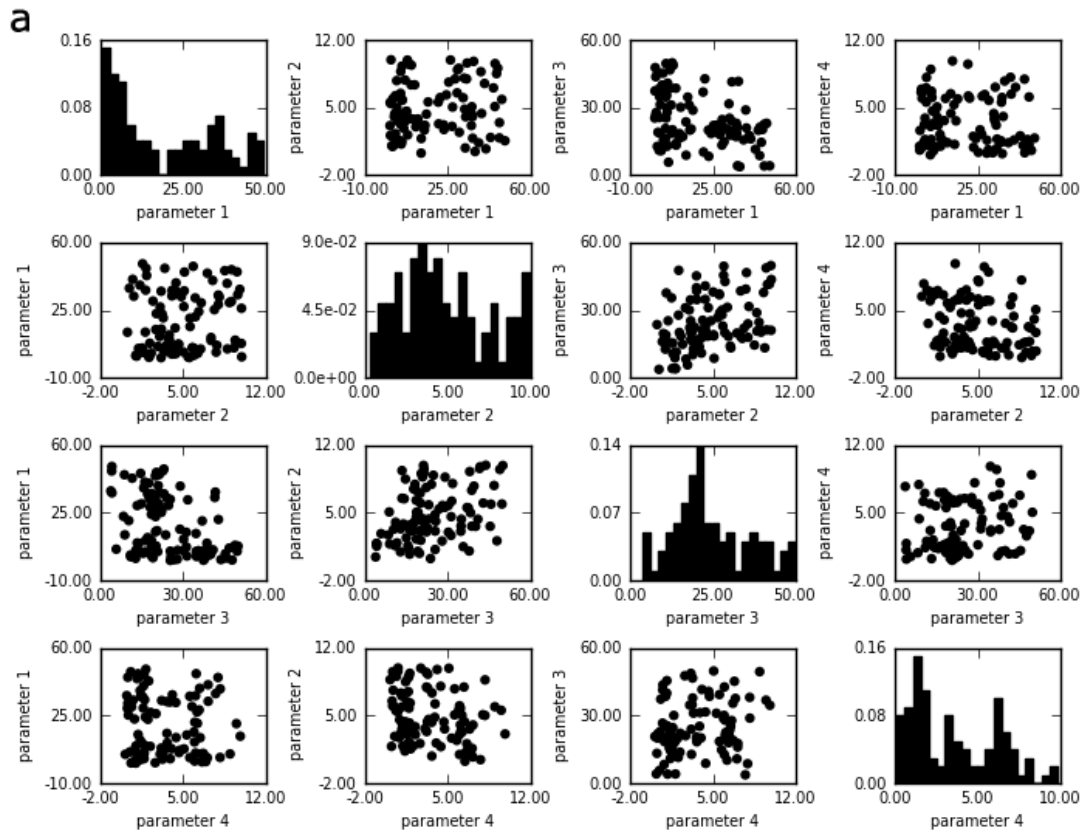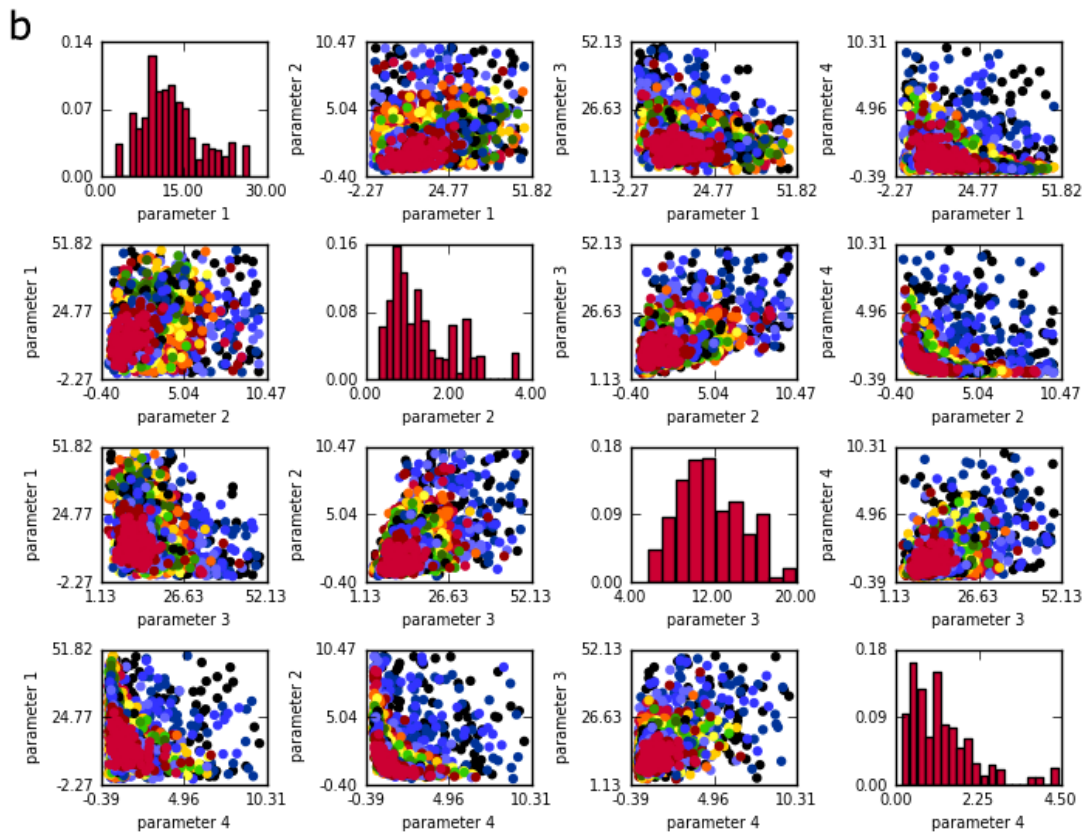

**Supplementary Data 3. Intermediate and final ABC-SMC populations.** Shown are the analytic plots produced by the ABC-SysBio software after each population. These plots include pairwise scatterplots of the accepted parameters

(a, b). The scatterplots contain the information of all previous populations (denoted by different colours). On the diagonal are the histograms of the latest population. After the first population (a) none of the parameters are inferred and the trajectories do not fit the data. However, by population 16 (b) all the parameters are inferred and the trajectories are in agreement with the data. (Note that the scaling of axes differs between populations in these diagnostic plots.)
